# Supplementary material
Source: MDPI journal article supplement (https://www.mdpi.com/1424-8247/15/4/451)

## Supplementary Material

# Design, Synthesis, and Molecular Docking Studies of Curcumin Hybrid Conjugates as Potential Therapeutics for Breast Cancer

Siva S. Panda <sup>1,\*</sup>, Queen L. Tran <sup>1</sup>, Pragya Rajpurohit <sup>2,3</sup>, Girinath G. Pillai <sup>4</sup>, Sean J. Thomas <sup>1</sup>, Allison E. Bridges <sup>2,3</sup>, Jason E. Capito <sup>1</sup>, Muthusamy Thangaraju <sup>2,3,\*</sup> and Bal L. Lokeshwar <sup>2,3,5</sup>

<sup>1</sup> Department of Chemistry and Physics, Augusta University, Augusta, GA 30912, USA; queentran29@gmail.com (Q.L.T.); seanjosephthomas@gmail.com (S.J.T.); jcaps79@gmail.com (J.E.C.)

<sup>2</sup> Department of Biochemistry and Molecular Biology, Augusta University, Augusta, GA 30912, USA; pragyaraj2018@gmail.com (P.R.); allison.bridges@ngu.edu (A.E.B.); blokeshwar@augusta.edu (B.L.L.)

<sup>3</sup> Georgia Cancer Center, Augusta, GA 30912, USA

<sup>4</sup> Discovery Chemistry Nyro Research India, Kochi 682021, India; giribio@gmail.com

<sup>5</sup> Department of Medicine, Medical College of Georgia, Augusta University, Augusta, GA 30912, USA

\* Correspondence: sipanda@augusta.edu (S.S.P.); mthangaraju@augusta.edu (M.T.)

<sup>1</sup>H NMR and <sup>13</sup>C NMR of all the synthesized compounds.

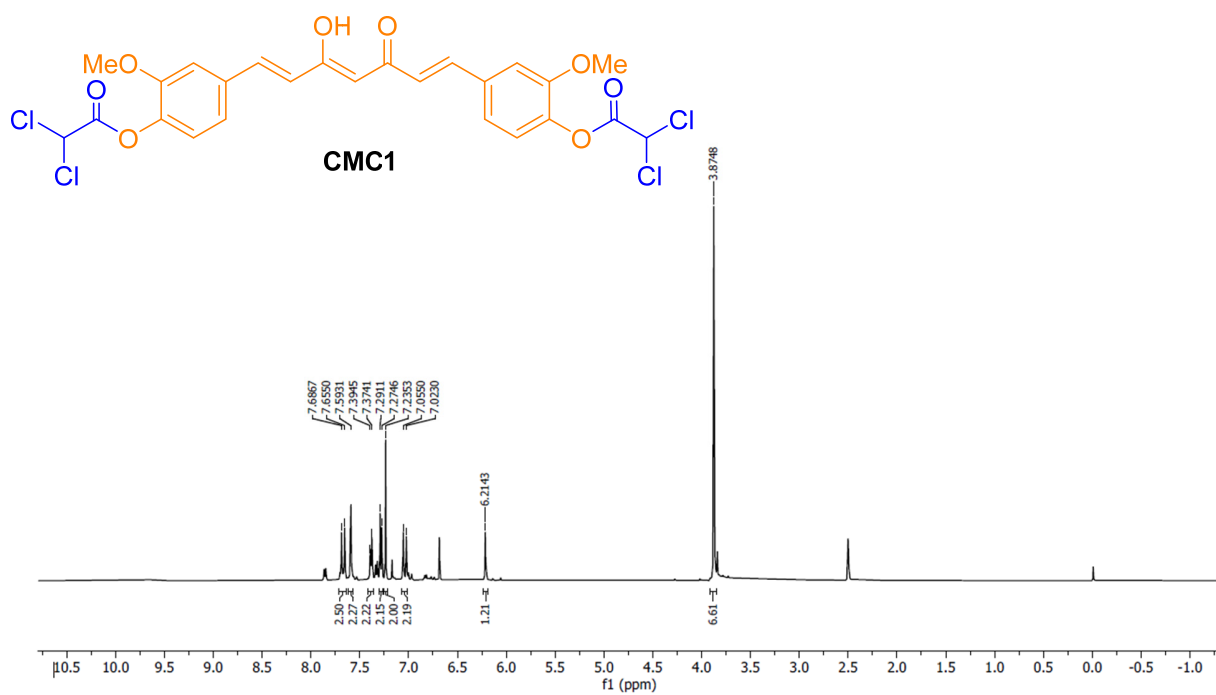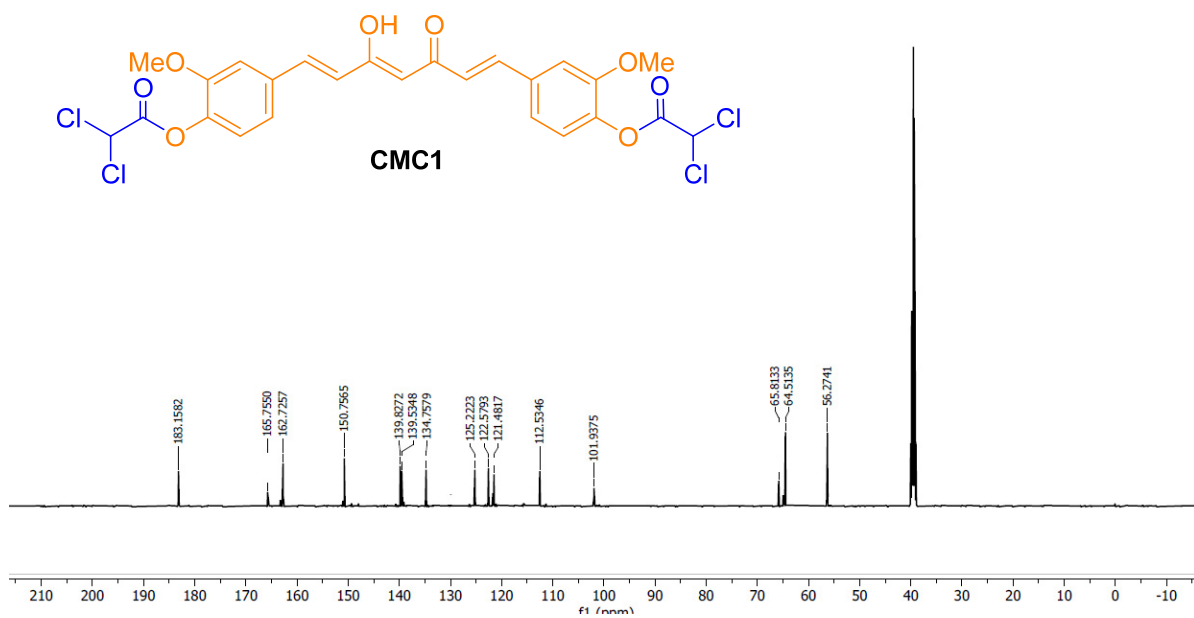

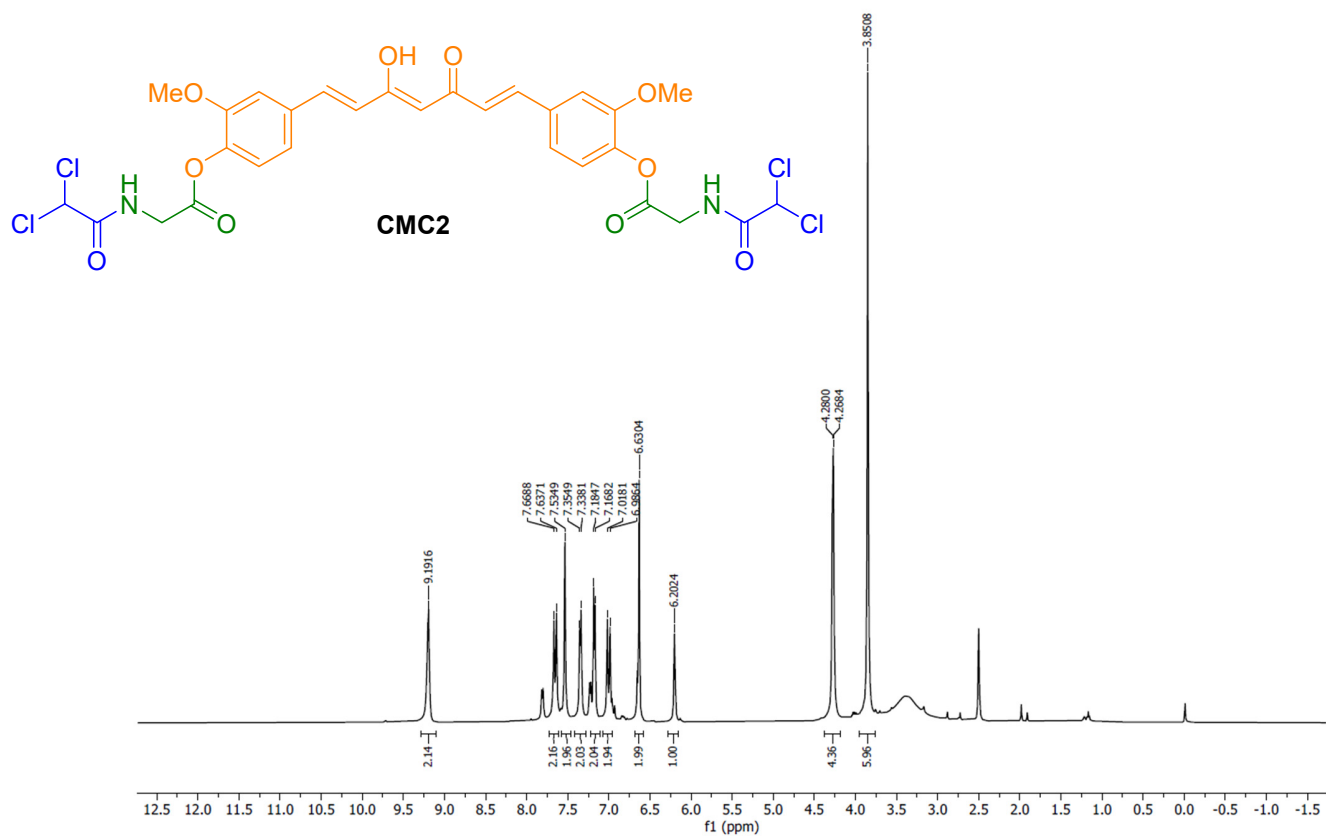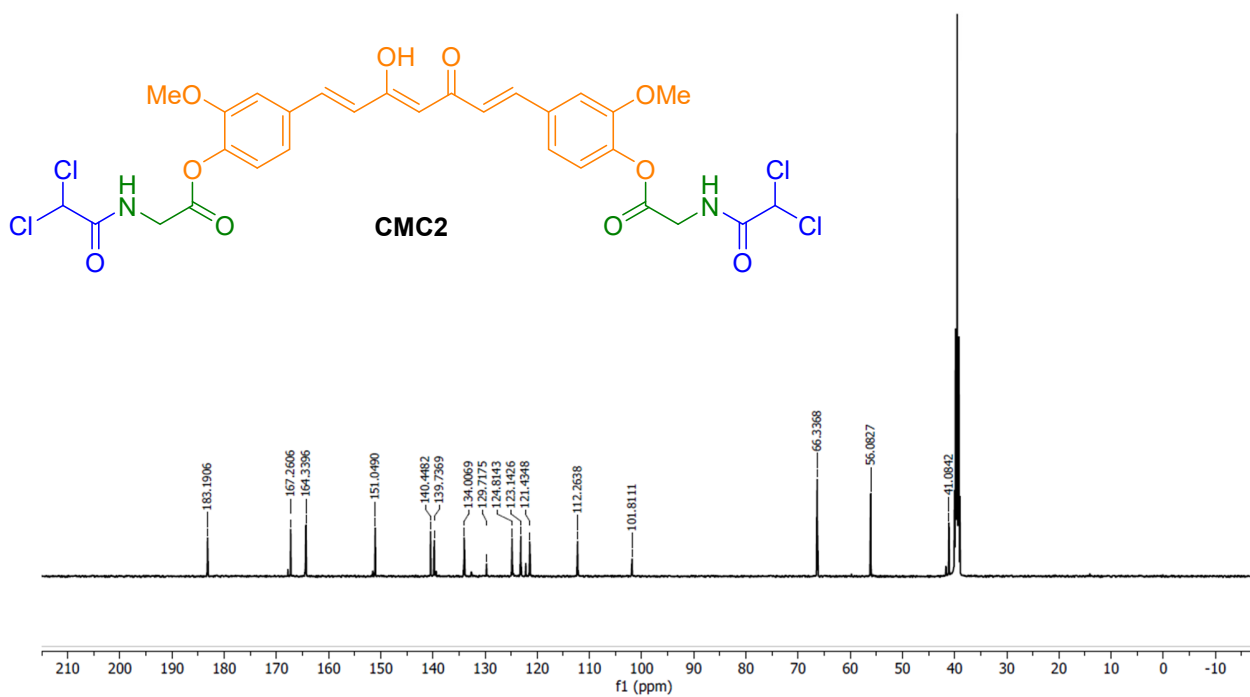

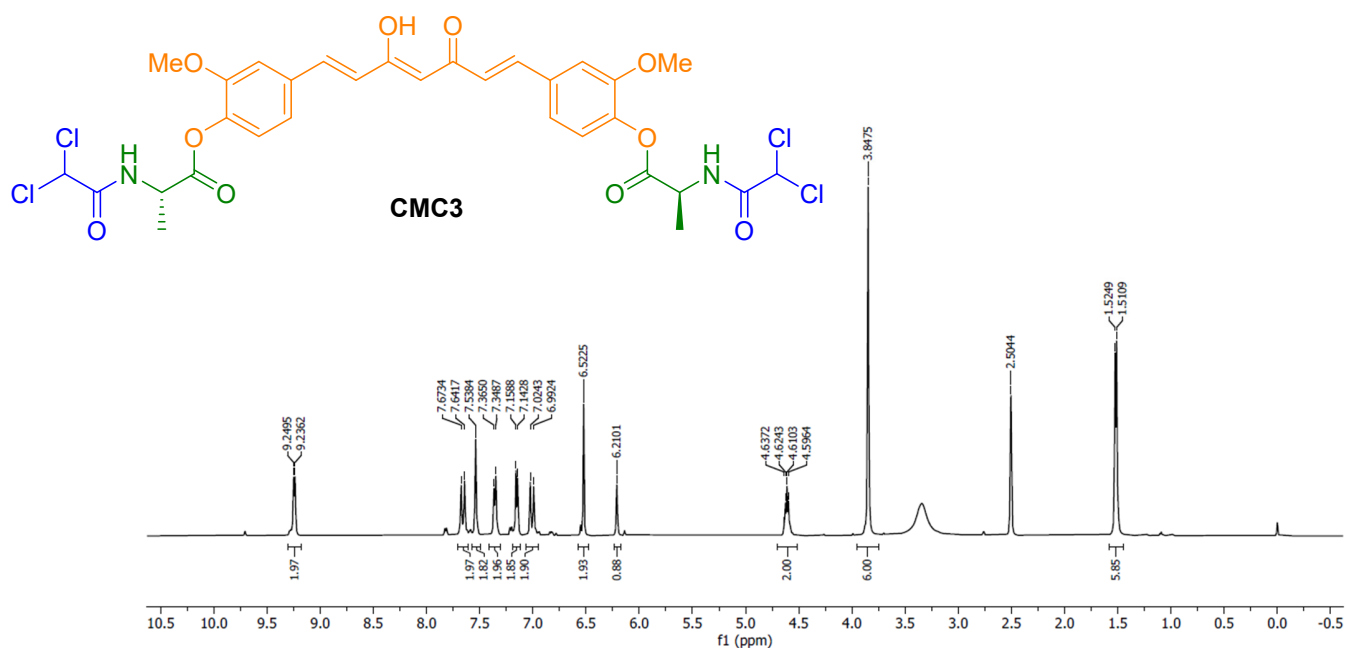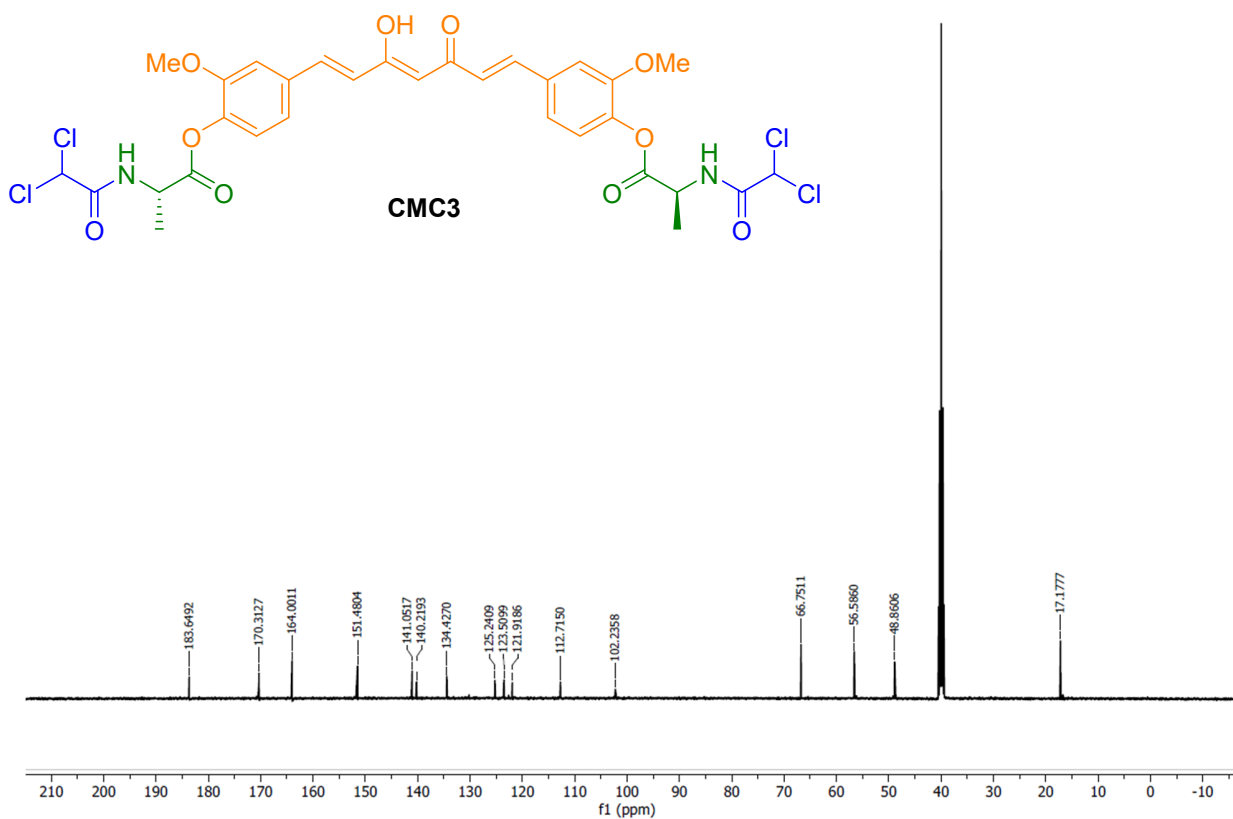

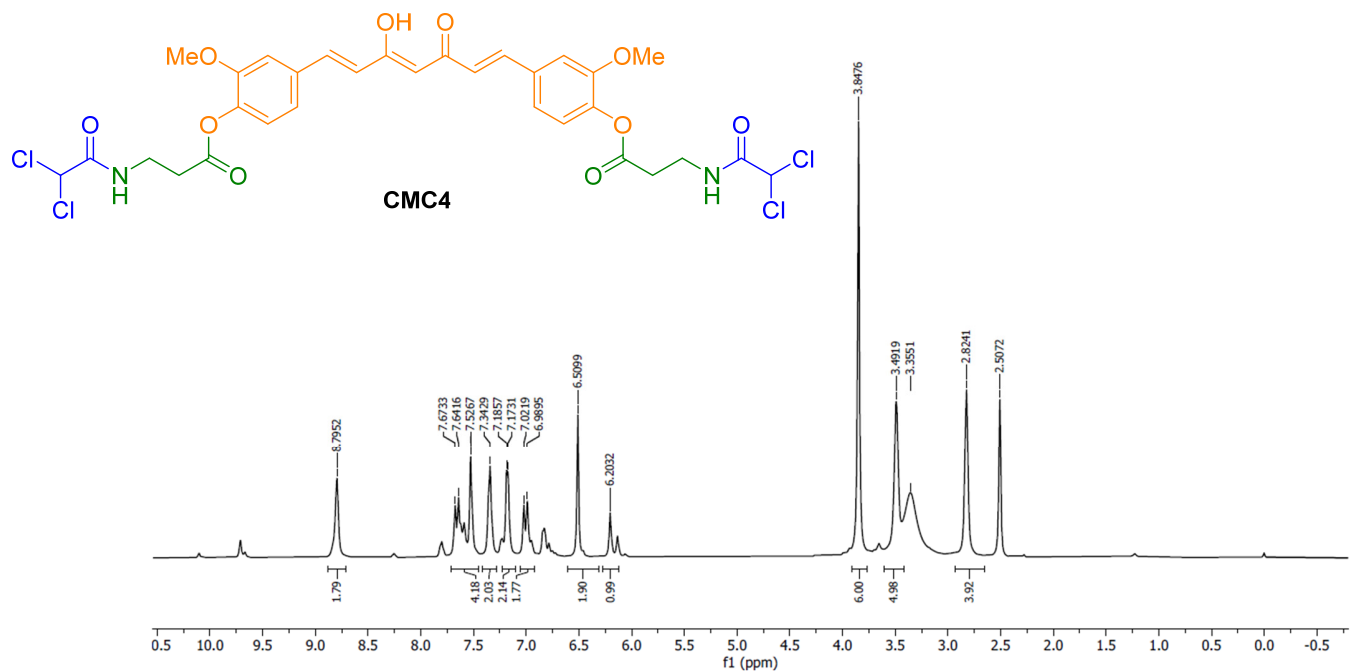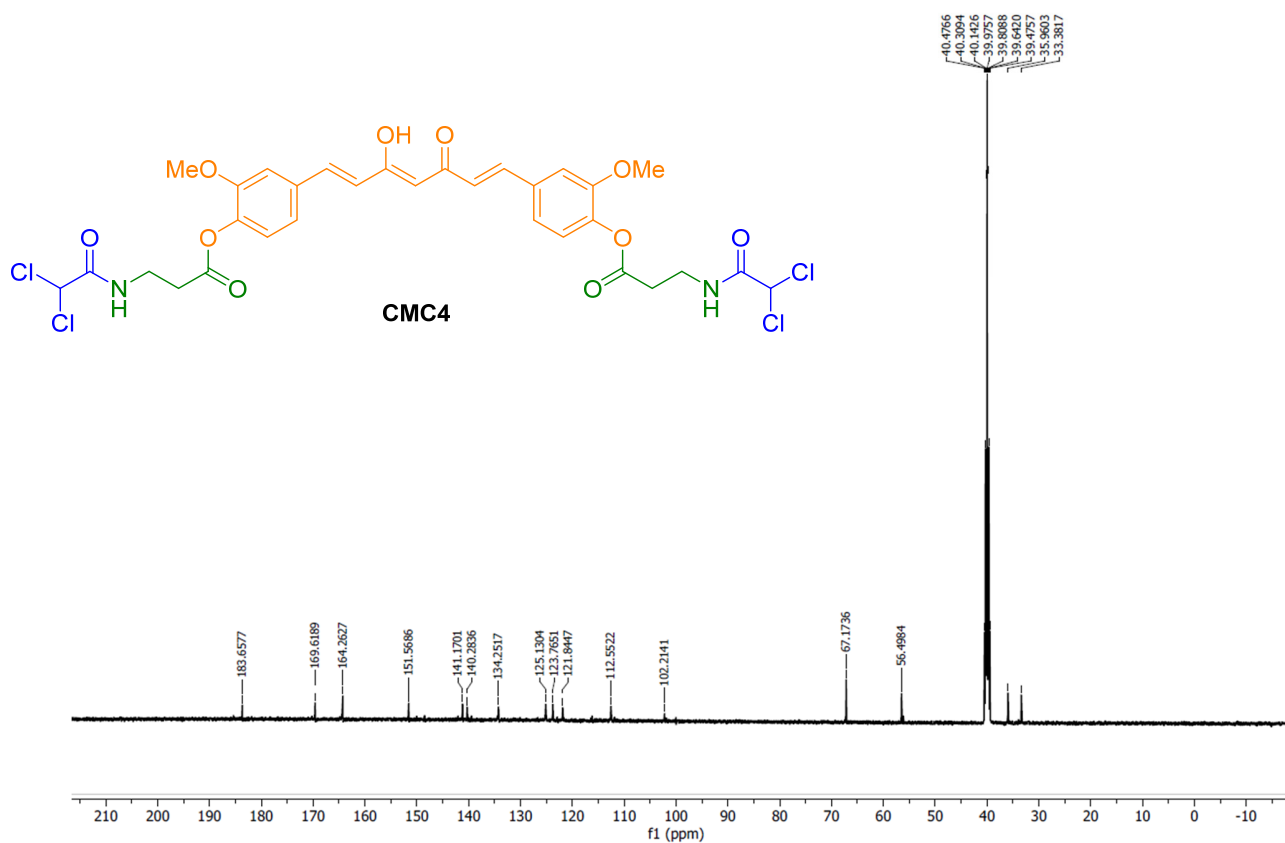

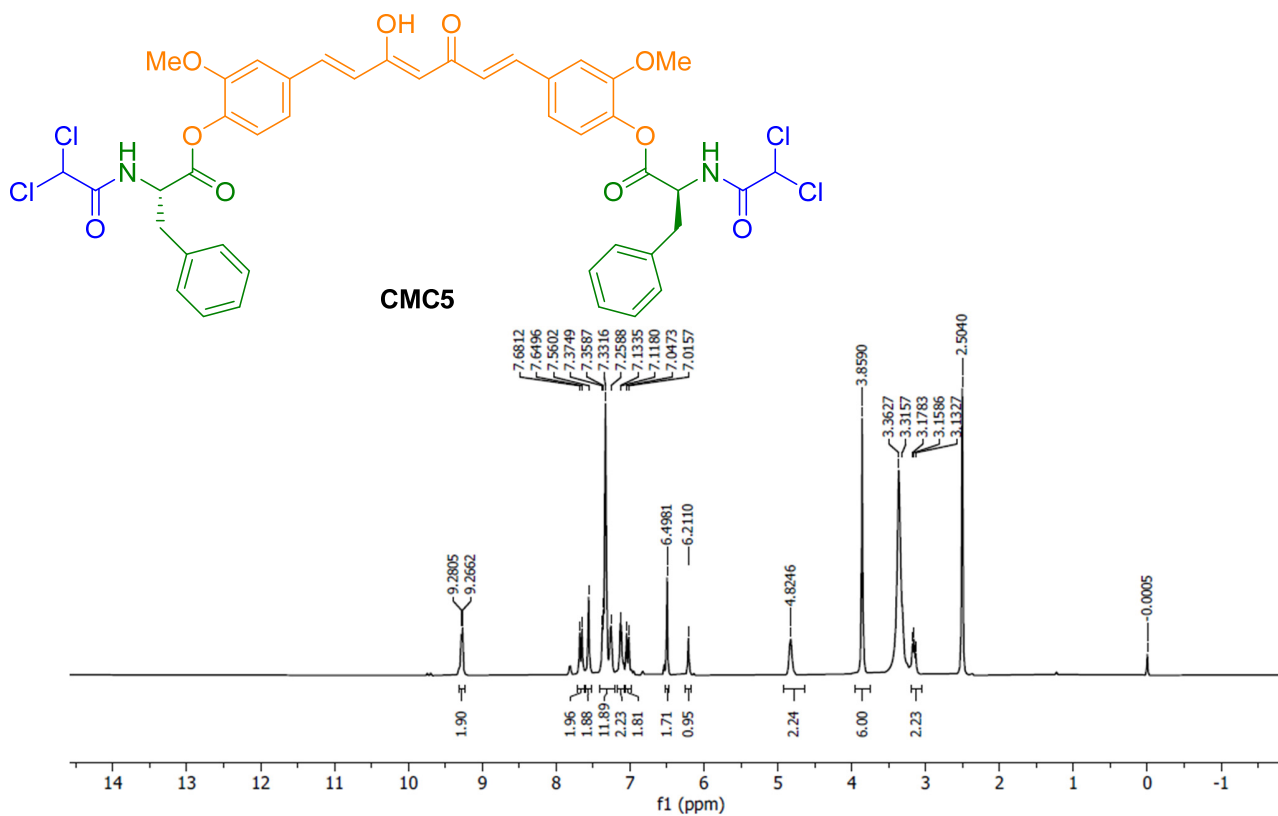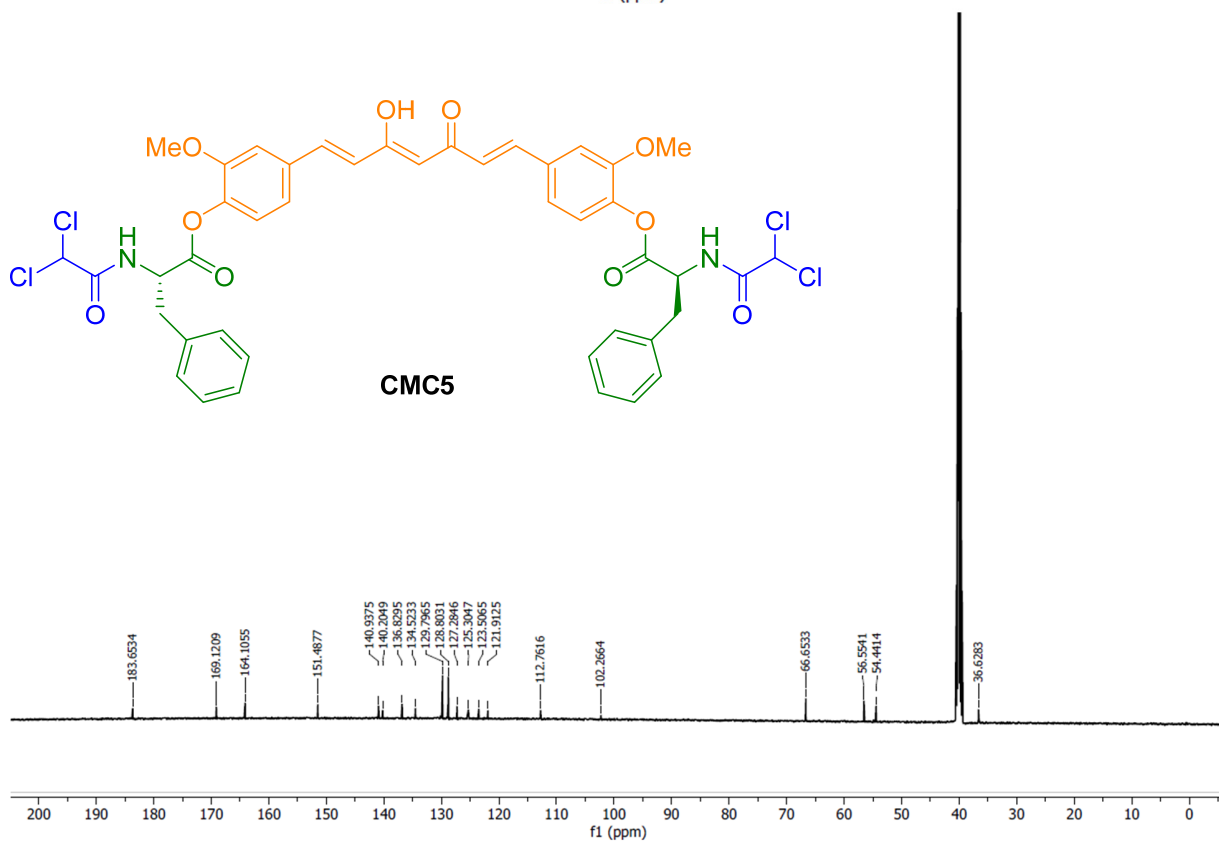

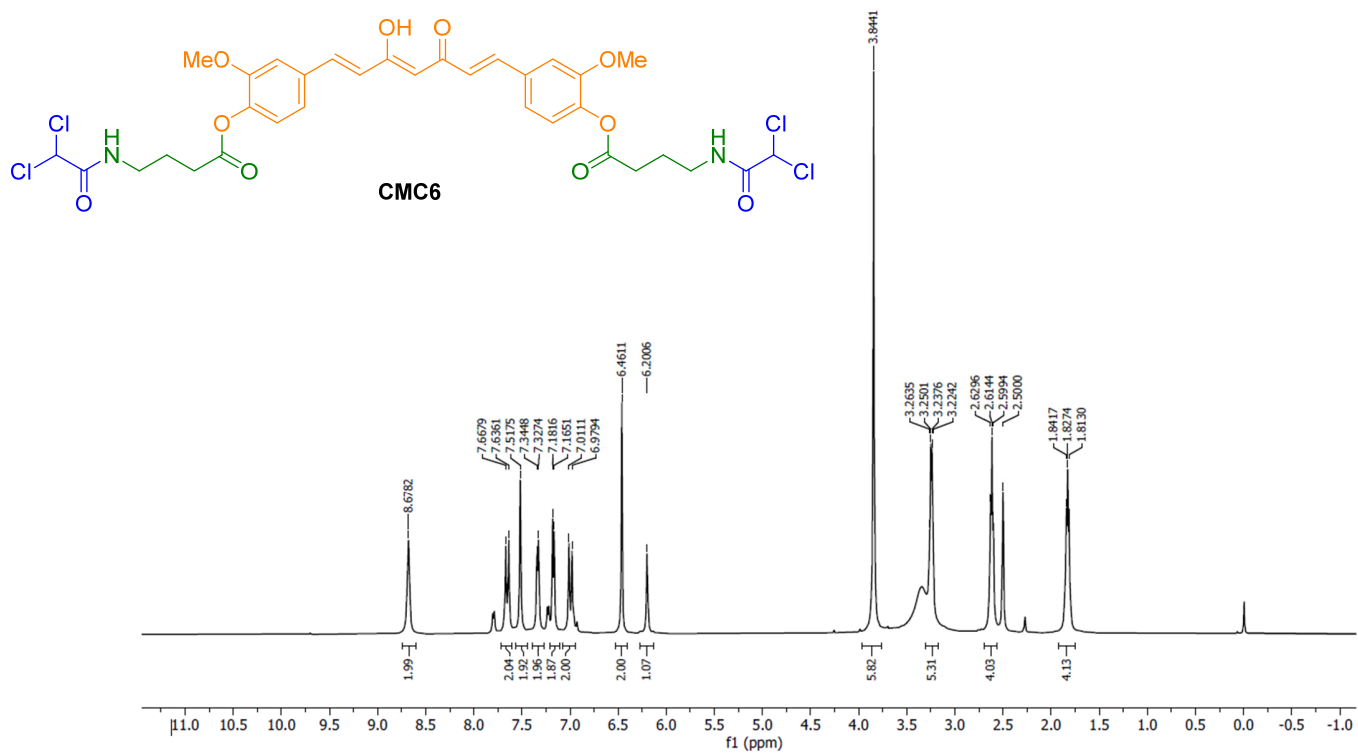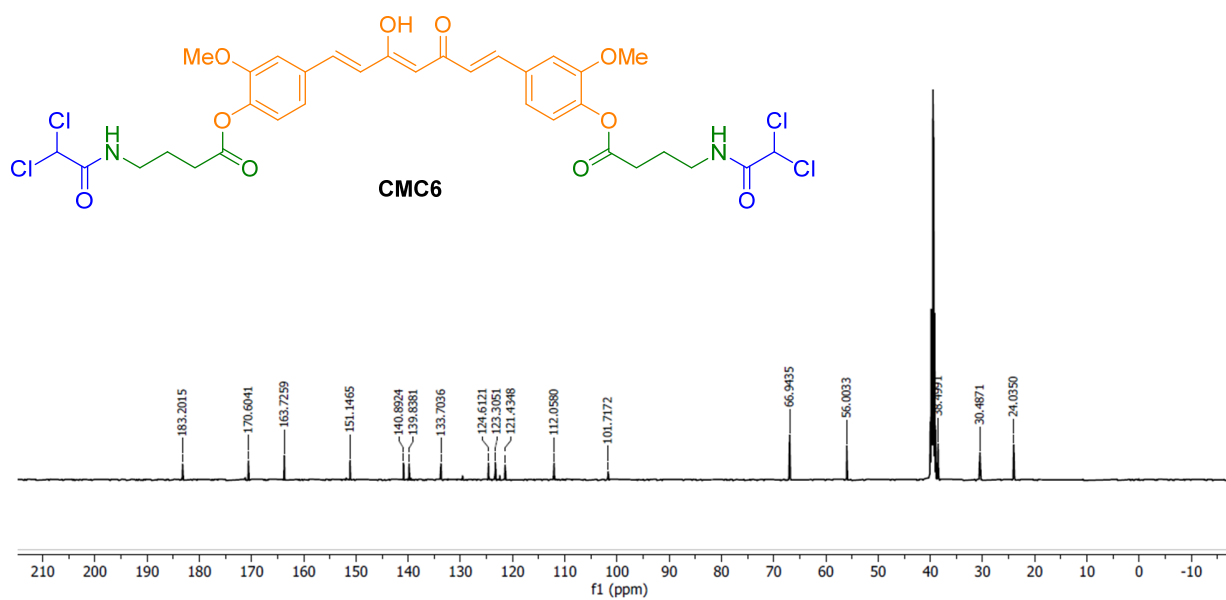

Supplement: s1 [file s1]
